# Supplementary material
Source: MDPI journal article supplement (https://www.mdpi.com/2297-8739/9/10/276)
Supplement: s1 [file s1]

# Integrated electro-ozonation and fixed-bed column for the simultaneous removal of emerging contaminants and heavy metals from aqueous solutions

Amin Mojiri <sup>1\*</sup>, Noriatsu Ozaki <sup>1\*</sup>, John L. Zhou <sup>2</sup>, Reza Andasht Kazerooni <sup>3</sup>, Mohammad Ali Zahed <sup>4</sup>, Shahabaldin Rezania <sup>5</sup>, Mohammadtaghi Vakili <sup>6</sup>, Shahin Gavanji <sup>7</sup>, Hossein Farraji <sup>8</sup>

<sup>1</sup> Department of Civil and Environmental Engineering, Graduate School of Advanced Science and Technology, Higashihiroshima 739-8725, Japan

<sup>2</sup> School of Civil and Environmental Engineering, University of Technology Sydney, Sydney, NSW, 2007, Australia

<sup>3</sup> Faculty of Civil Engineering, Xi'an University of Architecture and Technology, Xi'an 710055, China

<sup>4</sup> Faculty of Biological Sciences, Kharazmi University, Tehran 15719-14911, Iran

<sup>5</sup> Department of Environment and Energy, Sejong University, Seoul, 05006, South Korea

<sup>6</sup> Green intelligence Environmental School, Yangtze Normal University, Chongqing, 408100, China

<sup>7</sup> Department of Biotechnology, Faculty of Advanced Sciences and Technology, University of Isfahan, Isfahan 8174673441, Iran

<sup>8</sup> School of Physical and Chemical Sciences, University of Canterbury, Christchurch, New Zealand

\* Correspondence: amin.mojiri@gmail.com (A.M.); ojaki@hiroshima-u.ac.jp (N.O.)

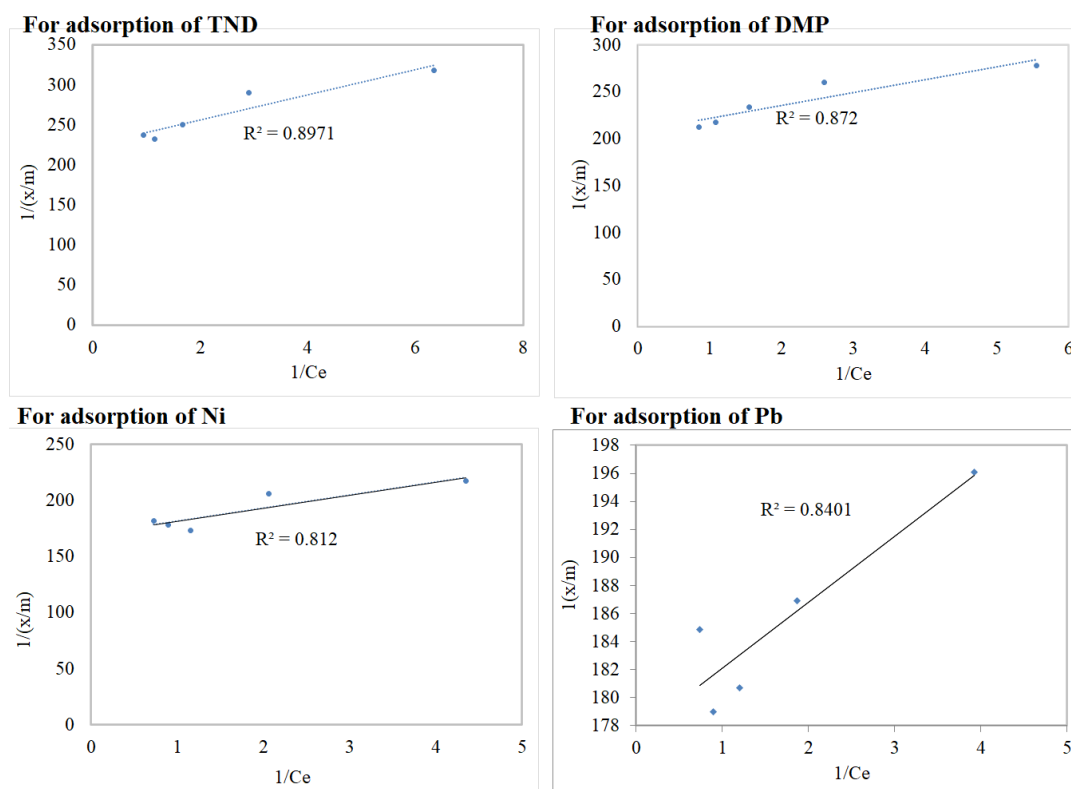

Figure S1. Plot for the Langmuir adsorption isotherm.

**For the adsorption of TND**

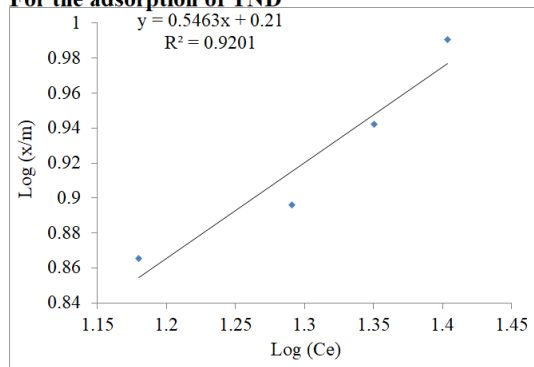

**For the adsorption of DMP**

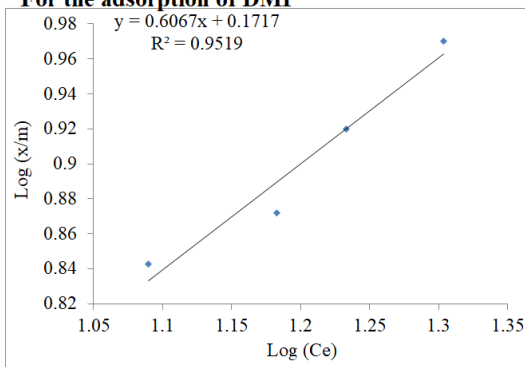

**For the adsorption of Ni**

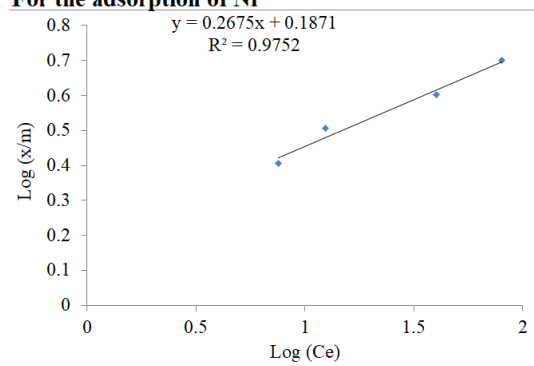

**For the adsorption of Pb**

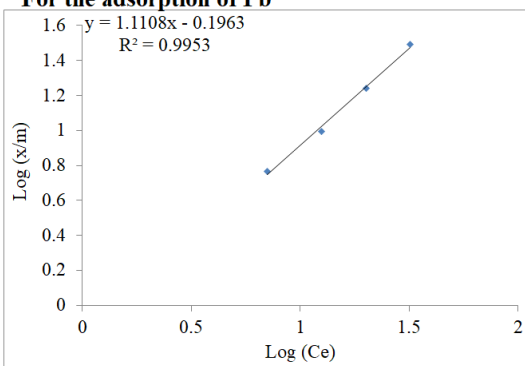

**Figure S2.** Plot for the Freundlich adsorption isotherm.
